# Supplementary material
Source: PubMed Central journal article supplement (PMC6643657)
Supplement: ao7b01454_si_001.pdf [file ao7b01454_si_001.pdf]

The Role of Biorelevant Dissolution Media in the  
Selection of Optimal Salt Forms of Oral Drugs:  
Maximising the Gastrointestinal Solubility and *In  
Vitro* Activity of the Antimicrobial Molecule,  
Clofazimine.

*Pauric Bannigan<sup>1, 2</sup>, Edel Durack<sup>1, 2</sup>, Conor Madden<sup>1, 2</sup>, Matteo Lusi<sup>1</sup> and Sarah P. Hudson<sup>1, 2\*</sup>*

*<sup>1</sup>Department of Chemical Sciences, University of Limerick, Castletroy, Co. Limerick, Ireland.*

*<sup>2</sup>Synthesis and Solid State Pharmaceutical Centre, Bernal Institute, University of Limerick,  
Castletroy, Co. Limerick, Ireland.*

Biorelevant dissolution media, Supersaturating Drug Delivery Systems, Clofazimine, Drug  
Repurposing, Antimicrobial resistance,

TABLES:

| Solid form | Bond observed and peak position (1/cm) |             |
|------------|----------------------------------------|-------------|
|            | $N_C^+ - H$                            | $C=N_C$     |
| CFZ F III  | n/a                                    | 1626.5      |
| CFZ.Sul    | 3299.8                                 | 1624.3 (br) |
| CFZ.Pho    | 3325.2 (br)                            | 1620.9      |
| CFZ.Cit    | 3323.9 (br)                            | 1616.9      |
| CFZ.Ace    | 3325.2 (br)                            | 1621.4      |

**Table S1:** Summary of the peaks position for the key function groups in various CFZ solid forms from the FTIR spectra

| Bond observed                       | Chemical shift (ppm) | Intermolecular distance** (Å)      | Chemical shift (ppm) | Intermolecular distance** (Å) | Chemical shift (ppm) | Intermolecular distance** (Å) |
|-------------------------------------|----------------------|------------------------------------|----------------------|-------------------------------|----------------------|-------------------------------|
|                                     | CFZF I*              | 49.4                               | 1.465                | 149 - 151.4 (m)               | 1.293                | 149 - 151.4 (m)               |
|                                     | CFZF II              | 48.7                               | 1.457                | 149.4 - 151.6 (m)             | 1.298                | 149.4 - 151.6 (m)             |
|                                     | CFZF III             | 49                                 | 1.457                | 149.73                        | 1.296                | 150.7                         |
|                                     | Citrate              | 48.84 - 46.46 (m),<br>45.47, 44.71 | 1.471                | 143.05, 141.65                | 1.328                | 151.08                        |
|                                     | Phosphate            | 48.21, 47.16                       | 1.469                | 143.84                        | 1.322                | 152.35 - 150.24 (m), 149.70   |
|                                     | Sulphate             | 51.21, 48.23                       | 1.462                | 144.26 - 142.46 (m)           | 1.322                | 150.96                        |
| Solution NMR:                       |                      |                                    |                      |                               |                      |                               |
| CFZ in CDCl <sub>3</sub>            | 49.4                 | n/a                                | 150.4                | n/a                           | 151.1                | n/a                           |
| CFZ from Gaussian 09 software (cal) | 50.46                | n/a                                | 152.12               | n/a                           | 152.55               | n/a                           |

\*taken from FI resolved as DAKXU101 exhibits disorder in its isopropyl group.

\*\*Calculated using Mercury software from single crystal cif files (average taken for solid Z' numbers greater > 1)

**Table S2:** Summary of bond lengths from crystal structures of CFZ solid forms and <sup>13</sup>C chemical shifts of the same key functional groups in CPMAS <sup>13</sup>C spectra for CFZ solid forms. The chemical shifts of the CFZ carbons from solution NMR and molecular modelling are also shown for comparison

FIGURES:

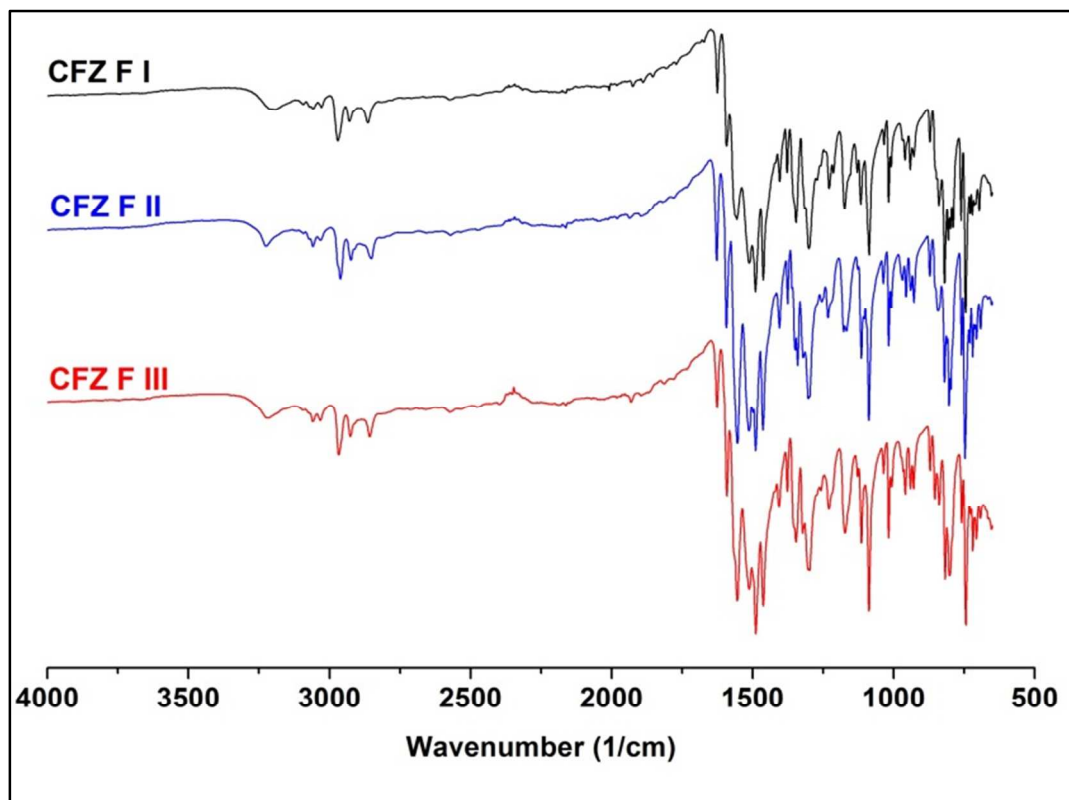

**Figure S1:** Comparison of the full FTIR spectra for the CFZ polymorphs F I, F II and F III.

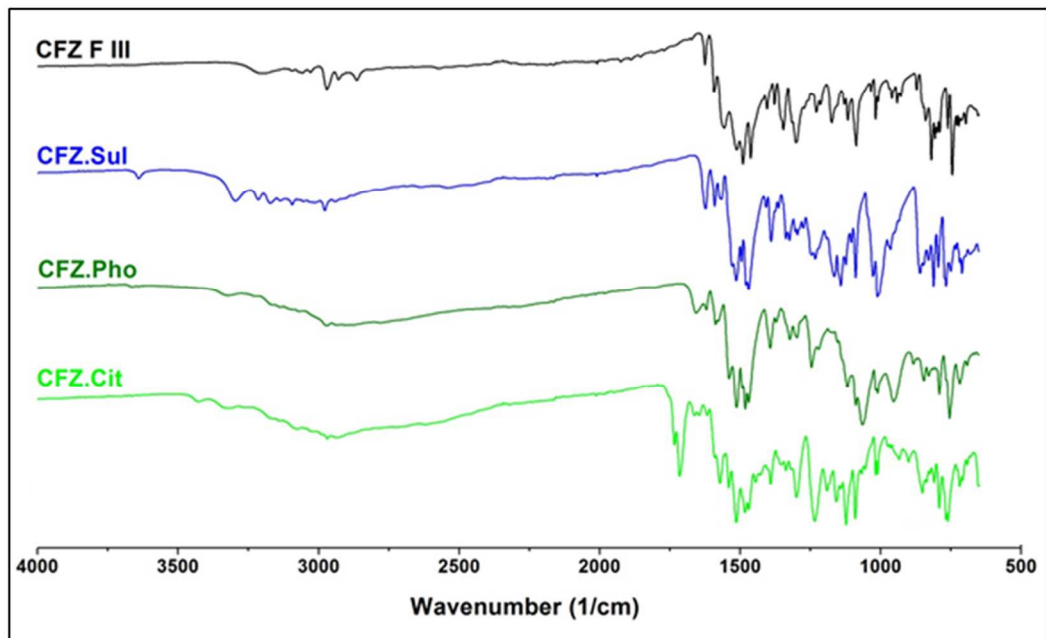

**Figure S2:** Comparison of the full FTIR spectra of the new CFZ salts with CFZ F III.

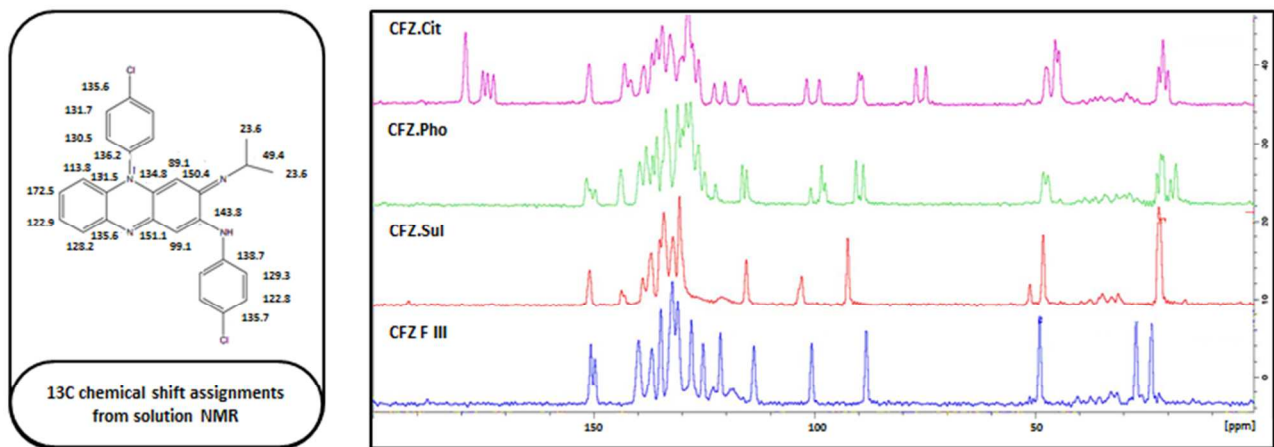

**Figure S3:** Left; Chemical structure of CFZ with  $^{13}\text{C}$  peaks assigned. Right; Comparison of full  $^{13}\text{C}$  CPMAS spectra obtained of acetate, citrate, phosphate, sulphate and CFZ F III, peaks corresponding to the secondary ketimine carbon (green) and the isopropyl carbon (blue) are highlighted.
